# Supplementary material for: Development of patient-centred standards of care for rheumatoid arthritis in Europe: the eumusc.net project
Source: PubMed Central journal article supplement — Ann Rheum Dis. 2013 Aug 6;73(5):902–5. doi: 10.1136/annrheumdis-2013-203743 (PMC3995221; doi:10.1136/annrheumdis-2013-203743), 2013-08-06
Supplement: annrheumdis-2013-203743-s1.pdf [file annrheumdis-2013-203743-s1.pdf]

## Appendix A

| <b>Expert Panel</b>                  |                |                                                                |                                                  |
|--------------------------------------|----------------|----------------------------------------------------------------|--------------------------------------------------|
| <b>Name</b>                          | <b>Country</b> | <b>Organisation</b>                                            | <b>Profession</b>                                |
| <b>Ales Ambrozic</b>                 | Slovenia       | University Medical Centre Ljubljana                            | Rheumatologist                                   |
| <b>Florian Berghea</b>               | Romania        | Universitatea de Medicina si Farmacie Carol Davila             | Rheumatologist                                   |
| <b>Annelies Boonen</b>               | Netherlands    | Maastricht University Medical Center                           | Rheumatologist                                   |
| <b>Ailsa Bosworth</b>                | UK             | National Rheumatoid Arthritis Society                          | Patient Research Partner                         |
| <b>Loreto Carmona</b>                | Spain          | Instituto de Salud Musculoesqueletica                          | Rheumatologist & Epidemiologist                  |
| <b>Maxime Dougados</b>               | France         | EULAR & Association de recherche clinique en rhumatologie ARCR | Rheumatologist                                   |
| <b>Maarten De Wit</b>                | Netherlands    | Reumapatientenbond                                             | Patient Research Partner                         |
| <b>Josephine Erwin</b>               | UK             | Royal Cornwall Hospital                                        | Social and Health Scientist                      |
| <b>Veronika Fialka-Moser</b>         | Austria        | Medizinische Universität Wien                                  | Specialist in Physical Medicine & Rehabilitation |
| <b>Ruxandra Ionescu</b>              | Romania        | Universitatea de Medicina si Farmacie Carol Davila             | Rheumatologist                                   |
| <b>Anne-Maree Keenan</b>             | UK             | University of Leeds                                            | Rheumatologist                                   |
| <b>Estibaliz Loza</b>                | Spain          | Instituto de Salud Musculoesqueletica                          | Rheumatologist                                   |
| <b>Rikke Helene Moe</b>              | Norway         | Diakonhjemmet Hospital                                         | Physiotherapist & Health Scientist               |
| <b>Rolf Greif</b>                    | Sweden         | Rheumatikerförbundet, Swedish Rheumatism Association           | Patient Research Partner                         |
| <b>Pawel Olejnik</b>                 | Poland         | Instytut Reumatologii                                          | Physician                                        |
| <b>Ingemar Petersson</b>             | Sweden         | Lund University                                                | Rheumatologist                                   |
| <b>Anne Christine Rat</b>            | France         | Université de Lorraine, Université Paris Descartes             | Rheumatologist                                   |
| <b>Blaz Rozman</b>                   | Slovenia       | University Medical Centre Ljubljana                            | Rheumatologist                                   |
| <b>Josef Smolen</b>                  | Austria        | Medizinische Universität Wien                                  | Rheumatologist                                   |
| <b>Tanja Stamm</b>                   | Austria        | Medizinische Universität Wien                                  | Occupational Therapist & Health Scientist        |
| <b>Michaela Stoffer</b>              | Austria        | Medizinische Universität Wien                                  | Occupational Therapist & Health Scientist        |
| <b>Britta Strömbeck</b>              | Sweden         | Lund University                                                | Physiotherapist & Health Scientist               |
| <b>Lorraine Tanner</b>               | UK             | National Rheumatoid Arthritis Society                          | Patient Research Partner                         |
| <b>Till Uhlig</b>                    | Norway         | Diakonhjemmet Hospital                                         | Rheumatologist                                   |
| <b>Theodora P. M. Vliet Vlieland</b> | Netherlands    | Leiden University Medical Center                               | Physician & Physiotherapist & Health Scientist   |
| <b>Anthony Woolf</b>                 | UK             | Royal Cornwall Hospital                                        | Rheumatologist                                   |
