# Supplementary material for: Development of patient-centred standards of care for rheumatoid arthritis in Europe: the eumusc.net project
Source: PubMed Central journal article supplement — Ann Rheum Dis. 2013 Aug 6;73(5):902–5. doi: 10.1136/annrheumdis-2013-203743 (PMC3995221; doi:10.1136/annrheumdis-2013-203743), 2013-08-06
Supplement: annrheumdis-2013-203743-s3.pdf [file annrheumdis-2013-203743-s3.pdf]

Table S1

| Country                | Response | Documents available |
|------------------------|----------|---------------------|
| Albania                |          |                     |
| Armenia                | x        |                     |
| Austria                | x        | x                   |
| Belarus                |          |                     |
| Belgium                |          |                     |
| Bosnia and Herzegovina | x        |                     |
| Bulgaria               |          |                     |
| Croatia                | x        | x                   |
| Cyprus                 | x        |                     |
| Czech Republic         | x        | x                   |
| Denmark                | x        | x                   |
| Estonia                | x        | x                   |
| Finland                | x        | x                   |
| France                 | x        | x                   |
| Georgia                |          |                     |
| Germany                | x        | x                   |
| Greece                 |          |                     |
| Hungary                | x        | x                   |
| Iceland                |          |                     |
| Ireland                | x        | x                   |
| Israel                 | x        | x                   |
| Italy                  | x        | x                   |
| Latvia                 | x        | x                   |
| Lebanon                |          |                     |
| Lithuania              | x        | x                   |
| Macedonia              |          |                     |
| Malta                  | x        |                     |
| Moldova                | x        | x                   |
| Montenegro             | x        |                     |
| Netherlands            | x        | x                   |
| Norway                 | x        |                     |
| Poland                 |          | x                   |
| Portugal               |          | x                   |
| Romania                |          | x                   |
| Russian Federation     | x        | x                   |
| Serbia                 | x        | x                   |
| Slovakia               | x        | x                   |
| Slovenia               | x        |                     |
| Spain                  | x        | x                   |
| Sweden                 | x        | x                   |
| Switzerland            | x        | x                   |
| Turkey                 | x        |                     |
| Ukraine                |          |                     |
| United Kingdom         | x        | x                   |
