# Supplementary figures and images for: Development of patient-centred standards of care for rheumatoid arthritis in Europe: the eumusc.net project
Source: PubMed Central journal article supplement — Ann Rheum Dis. 2013 Aug 6;73(5):902–5. doi: 10.1136/annrheumdis-2013-203743 (PMC3995221; doi:10.1136/annrheumdis-2013-203743), 2013-08-06

Figure S 1

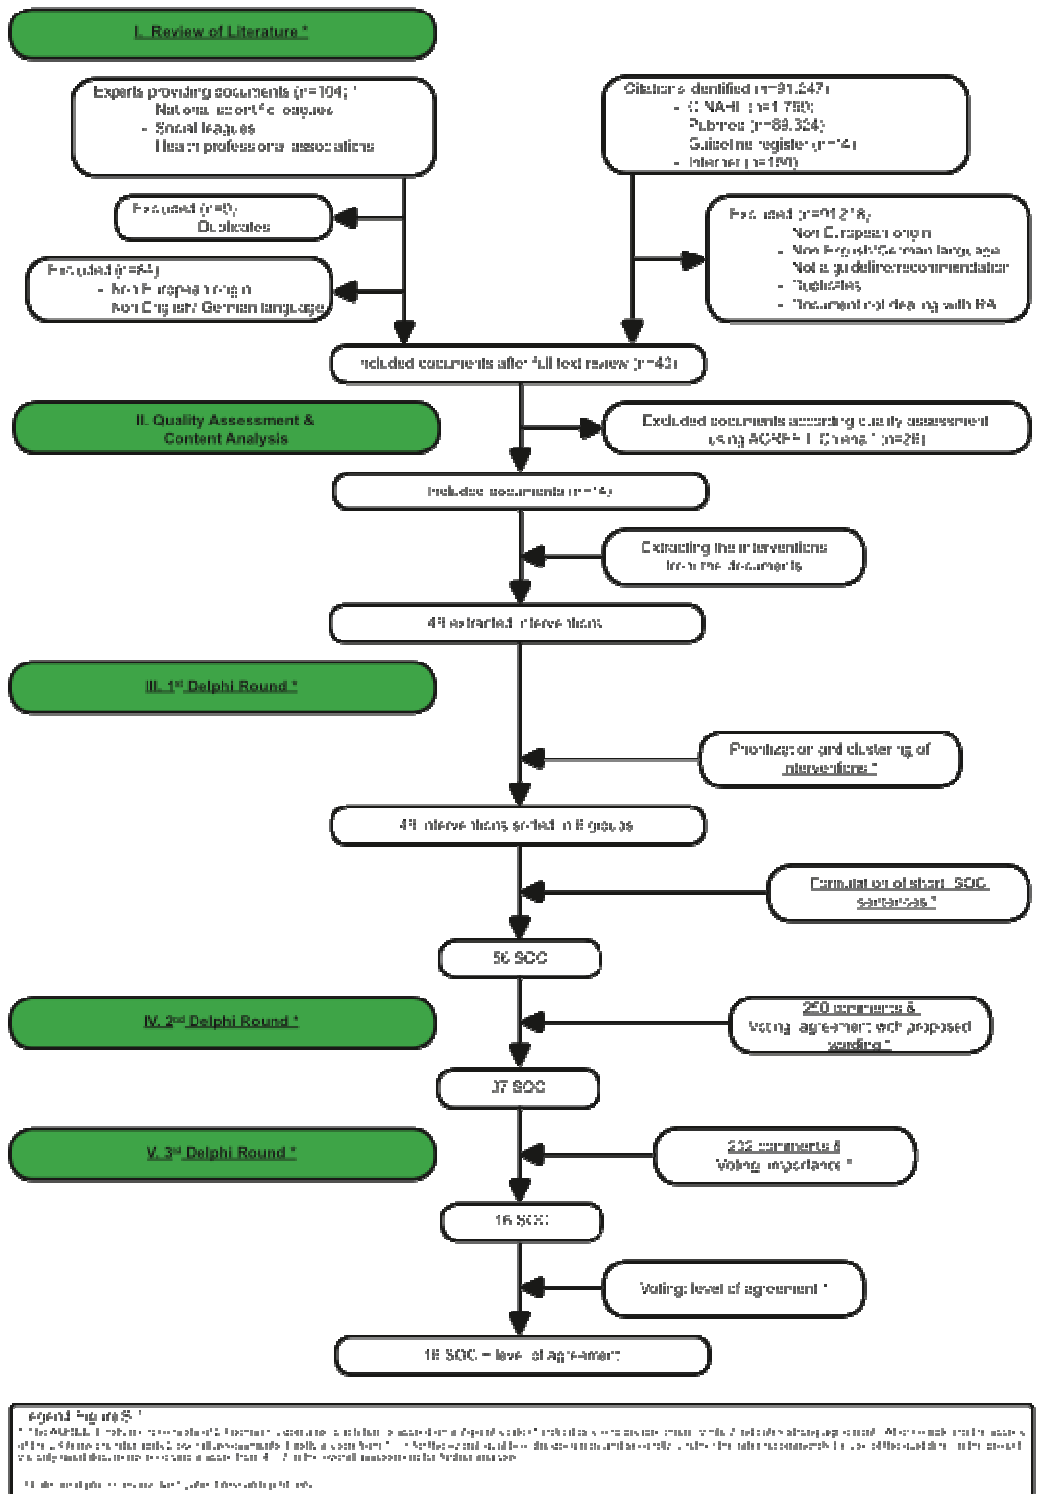

Supplement: annrheumdis-2013-203743-s2.pdf [file annrheumdis-2013-203743-s2.pdf]
